# Supplementary material for: Population structure, admixture analysis anddifferentiation in local Gudali and its crossbred withItalian Simmental, in Cameroon
Source: Research Square preprint supplement (doi:10.21203/rs.3.rs-5334622/v1), 2024-11-26
Supplement: Supplementary file 1 [file 88e8c4a46f070bb9a51183e8.xlsx]

## Sheet: Sheet1
Breed	Breed group	origin	number of animals	reference
Boran	Zebu	East Africa	20	Decker JE, McKay SD, Rolf MM, Kim J, Alcalá AM, Sonstegard TS, Hanotte O, Götherström A, Seabury CM, Praharani L. Worldwide patterns of ancestry, divergence, and admixture in domesticated cattle. PLoS Genet. 2014;10(3):e1004254.
EAZ	Zebu	East Africa	20	Decker JE, McKay SD, Rolf MM, Kim J, Alcalá AM, Sonstegard TS, Hanotte O, Götherström A, Seabury CM, Praharani L. Worldwide patterns of ancestry, divergence, and admixture in domesticated cattle. PLoS Genet. 2014;10(3):e1004254.
Ndama	African taurine	West Africa	56	Gautier, M., Flori, L., Riebler, A. et al. A whole genome Bayesian scan for adaptive genetic divergence in West African cattle. BMC Genomics 10, 550 (2009). https://doi.org/10.1186/1471-2164-10-550; Consortium BH. Genome-wide survey of SNP variation uncovers the genetic structure of cattle breeds. Science. 2009;324(5926):528–32.
ZBO	Zebu	West Africa	23	Gautier, M., Flori, L., Riebler, A. et al. A whole genome Bayesian scan for adaptive genetic divergence in West African cattle. BMC Genomics 10, 550 (2009). https://doi.org/10.1186/1471-2164-10-550
ZFU	Zebu	West Africa	43	Gautier, M., Flori, L., Riebler, A. et al. A whole genome Bayesian scan for adaptive genetic divergence in West African cattle. BMC Genomics 10, 550 (2009). https://doi.org/10.1186/1471-2164-10-550
Nellore	Zebu	Brazil	24	Matukumalli, L. K. et al. Development and characterization of a high density SNP genotyping assay for cattle. PLoS One 4, e5350 (2009)
Simmental	European taurine		20	Gao, Y., Gautier, M., Ding, X. et al. Species composition and environmental adaptation of indigenous Chinese cattle. Sci Rep 7, 16196 (2017). https://doi.org/10.1038/s41598-017-16438-7
Gudali	Zebu	Cameroon	717	generated in this study
Simgud	hybrid	Cameroon	139	generated in this study
Total			1062
