# Supplementary material for: Population structure, admixture analysis anddifferentiation in local Gudali and its crossbred withItalian Simmental, in Cameroon
Source: Research Square preprint supplement (doi:10.21203/rs.3.rs-5334622/v1), 2024-11-26
Supplement: Supplementary file 2 [file d96398f10f07bcd3334f8ff8.xlsx]

## Sheet: Sheet1
K	CV
10	0.54623
9	0.54708
8	0.547
7	0.54864
6	0.54925
5	0.55015
4	0.55182
3	0.55823
2	0.56982
1	0.59805
